# Supplementary material for: Confined NaAlH4 nanoparticles inside CeO2 hollow nanotubes towards enhanced hydrogen storage
Source: Royal Society of Chemistry journal article supplement (doi:10.1039/c7nr03512h), 2017-01-01
Supplement: c7nr03512h1.pdf [file c7nr03512h1.pdf]

Electronic Supplementary Information

**Confined NaAlH<sub>4</sub> Nanoparticles inside CeO<sub>2</sub> Hollow Nanotubes towards Enhanced**

**Hydrogen Storage**

Qili Gao,<sup>a</sup> Guanglin Xia<sup>\*b</sup> and Xuebin Yu<sup>\*a</sup>

**a.** Department of Materials Science, Fudan University, Shanghai 200433 , China.

**b.** Institute for Superconducting and Electronic Materials, University of Wollongong,  
North Wollongong, NSW 2522, Australia.

\*Corresponding authors: yuxuebin@fudan.edu.cn, guanglin@uow.edu.au

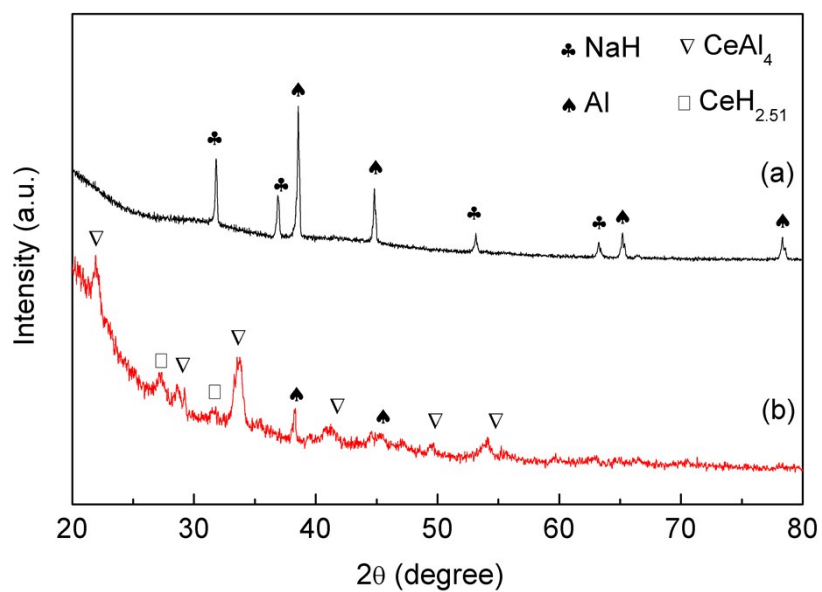

**Fig. S1.** XRD patterns of the dehydrogenated bulk  $\text{NaAlH}_4$  (a), and the milled  $\text{NaAlH}_4/\text{CeO}_2$  (b) at 350 °C.

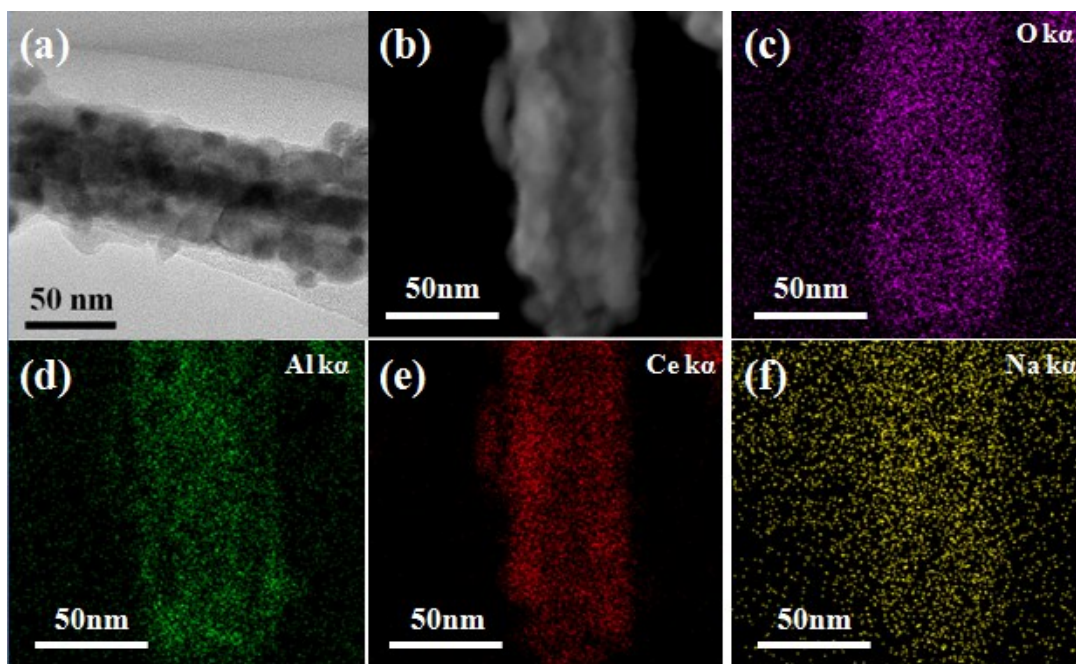

**Fig. S2.** TEM images of  $\text{NaAlH}_4@\text{CeO}_2$  after the dehydrogenation (a, b), and the corresponding EDS maps of (c) O, (d) Al, (e) Ce, and (f) Na elements for image (b).

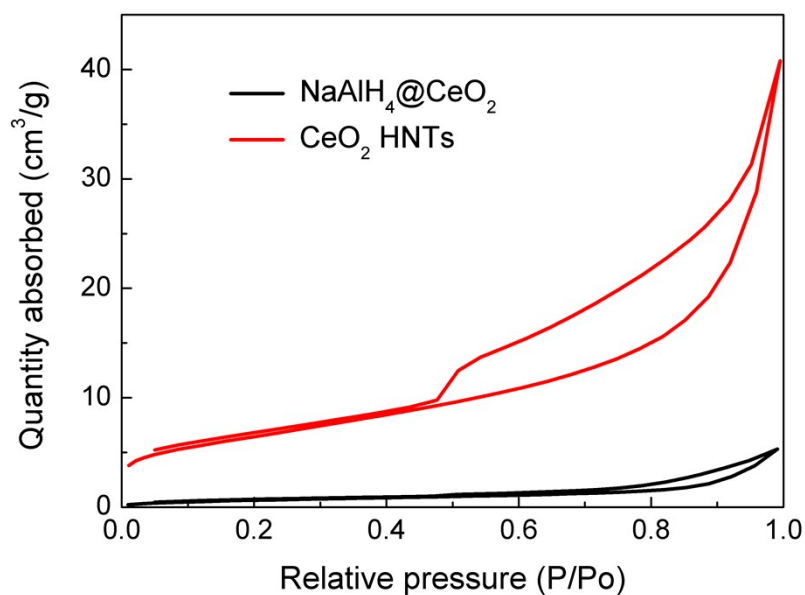

**Fig. S3.**  $\text{N}_2$  absorption-desorption isotherms at 77 K for as-prepared  $\text{CeO}_2$  HNTs and  $\text{NaAlH}_4@\text{CeO}_2$ .

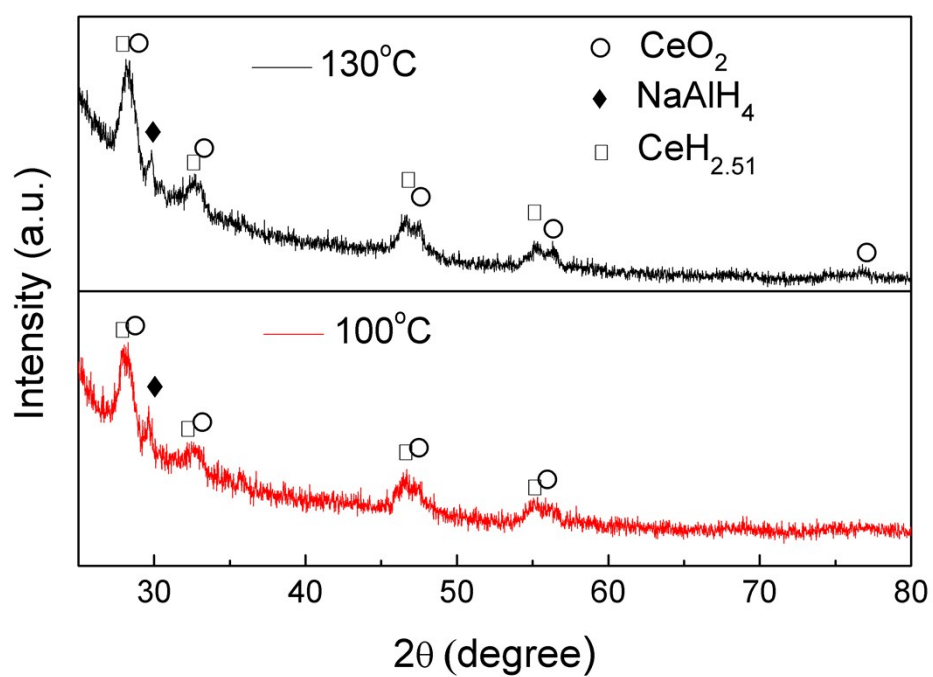

**Fig. S4.** XRD patterns of the dehydrogenated NaAlH<sub>4</sub>@CeO<sub>2</sub> at 100 °C and 130 °C.
